# Supplementary material for: Ancient horizontal transfer of transaldolase-like protein gene and its role in plant vascular development
Source: PubMed Central journal article supplement (PMC4407918; doi:10.1111/nph.13183), 2014-11-24
Supplement: nph0206-0807-sd1.pdf [file nph0206-0807-sd1.pdf]

## Supporting Information Fig. S1 and Tables S1–S4

**Table S1** List of the 50 eukaryotic complete genome sequences or ESTs used in this study, in addition to the NCBI *nr* database

| Species                               | Lineage              |
|---------------------------------------|----------------------|
| <i>Acanthamoeba castellanii</i>       | Amoebozoa            |
| <i>Antonospora locustae</i>           | Microsporidians      |
| <i>Aureococcus anophagefferens</i>    | Pelagophytes         |
| <i>Batrachochytrium dendrobatidis</i> | Chytrids             |
| <i>Bigelowiella natans</i>            | Cercozoans           |
| <i>Blastocystis hominis</i>           | Stramenopiles        |
| <i>Brachionus plicatilis</i>          | Rotifers             |
| <i>Capitella</i> sp.                  | Segmented worms      |
| <i>Capsaspora owczarzaki</i>          | Opisthokonta         |
| <i>Chlorella</i> sp.                  | Green algae          |
| <i>Chlorella vulgaris</i>             | Green algae          |
| <i>Cyanidioschyzon merolae</i>        | Red algae            |
| <i>Cyanophora paradoxa</i>            | Glaucocystophyceae   |
| <i>Daphnia pulex</i>                  | Crustaceans          |
| <i>Dictyostelium purpureum</i>        | Cellular slime molds |
| <i>Emiliana huxleyi</i>               | Haptophytes          |
| <i>Euglena gracilis</i>               | Euglenoids           |
| <i>Glaucocystis nostochinearum</i>    | Glaucocystophyceae   |
| <i>Guillardia theta</i>               | Cryptomonads         |
| <i>Hartmannella vermiformis</i>       | Amoebozoa            |
| <i>Heterocapsa triquetra</i>          | Dinoflagellates      |
| <i>Hyperamoeba</i> sp.                | Amoebozoa            |
| <i>Isochrysis galbana</i>             | Haptophytes          |
| <i>Karenia brevis</i>                 | Dinoflagellates      |
| <i>Karlodinium micrum</i>             | Dinoflagellates      |

---

|                                  |                         |
|----------------------------------|-------------------------|
| <i>Lottia gigantea</i>           | Gastropods              |
| <i>Malawimonas jakobiformis</i>  | Malawimonadidae         |
| <i>Mastigamoeba balamuthi</i>    | Amoebozoa               |
| <i>Monosiga ovata</i>            | Choanoflagellates       |
| <i>Naegleria gruberi</i>         | Heterolobosea           |
| <i>Paracercomonas marina</i>     | Cercozoans              |
| <i>Pavlova lutheri</i>           | Haptophytes             |
| <i>Physarum polycephalum</i>     | Plasmodial slime molds  |
| <i>Phytophthora ramorum</i>      | Oomycetes               |
| <i>Phytophthora sojae</i>        | Oomycetes               |
| <i>Polysphondylium pallidum</i>  | Cellular slime molds    |
| <i>Polytomella parva</i>         | Green algae             |
| <i>Porphyra yezoensis</i>        | Red algae               |
| <i>Prototheca wickerhamii</i>    | Green algae             |
| <i>Reclinomonas americana</i>    | Jakobida                |
| <i>Rhizopus oryzae</i>           | Fungi                   |
| <i>Sawyeria marylandensis</i>    | Heterolobosea           |
| <i>Scenedesmus obliquus</i>      | Green algae             |
| <i>Seculamonas ecuadoriensis</i> | Jakobida                |
| <i>Sphaeroforma arctica</i>      | Opisthokonta            |
| <i>Spironucleus vortens</i>      | Diplomonads             |
| <i>Streblomastix strix</i>       | Oxymonadida             |
| <i>Thalassiosira pseudonana</i>  | Diatoms                 |
| <i>Trimastix pyriformis</i>      | Unclassified eukaryotes |

---

**Table S2** List of *TAL* genes in 17 representative land plant genomes

| <b>Lineage</b> | <b>Species</b>                    | <b>Name</b>   | <b>Locus</b>      | <b>Length</b> | <b>Intron</b> | <b>Chromosome</b> | <b>Location</b>     |
|----------------|-----------------------------------|---------------|-------------------|---------------|---------------|-------------------|---------------------|
|                | <i>Linum usitatissimum</i>        | <i>LuTAL1</i> | Lus10043136       | 436           | 6             | scaffold25        | 1384528–1386813     |
|                | <i>Linum usitatissimum</i>        | <i>LuTAL2</i> | Lus10032613       | 436           | 6             | scaffold140       | 1012925–1015257     |
|                | <i>Populus trichocarpa</i>        | <i>PtTAL1</i> | POPTR_0003s16030  | 436           | 6             | scaffold_3        | 15654057–15657021   |
|                | <i>Populus trichocarpa</i>        | <i>PtTAL2</i> | POPTR_0001s12930  | 440           | 6             | scaffold_1        | 10023678–10027179   |
|                | <i>Medicago truncatula</i>        | <i>MtTAL</i>  | Medtr7g006100     | 443           | 6             | 7                 | 845072–850479       |
| Dicots         | <i>Arabidopsis thaliana</i>       | <i>AtTAL</i>  | AT5G13420         | 438           | 6             | 5                 | 4301792–4304312     |
|                | <i>Capsella rubella</i>           | <i>CrTAL</i>  | Carubv10000972m   | 441           | 6             | scaffold_6        | 4298572–4301148     |
|                | <i>Thellungiella halophila</i>    | <i>ThTAL</i>  | Thhalv10013572m   | 439           | 6             | scaffold_2        | 4380727–4383435     |
|                | <i>Citrus sinensis</i>            | <i>CsTAL</i>  | orange1.1g036665m | 440           | 6             | scaffold00081     | 111594–114983       |
|                | <i>Vitis vinifera</i>             | <i>VvTAL</i>  | GSVIVG01001098001 | 441           | 6             | 1                 | 22628856–22634048   |
|                | <i>Mimulus guttatus</i>           | <i>MgTAL</i>  | mgv1a006041m      | 460           | 6             | scaffold_39       | 1460196–1462967     |
|                | <i>Sorghum bicolor</i>            | <i>SbTAL</i>  | Sb03g044500       | 429           | 5             | chromosome_3      | 71853994–71856810   |
|                | <i>Zea mays</i>                   | <i>ZmTAL</i>  | GRMZM2G134256     | 429           | 5             | 8                 | 160390396–160393378 |
| Monocots       | <i>Setaria italica</i>            | <i>SiTAL</i>  | Si001538m         | 429           | 5             | scaffold_5        | 45396389–45399497   |
|                | <i>Oryza sativa</i>               | <i>OsTAL</i>  | LOC_Os01g70170    | 432           | 5             | 1                 | 40610513–40613463   |
|                | <i>Brachypodium distachyon</i>    | <i>BdTAL</i>  | Bradi2g59370      | 429           | 5             | 2                 | 57090545–57093078   |
| Gymnosperm     | <i>Picea sitchensis</i>           | <i>PsTAL</i>  | ABR16241          | 444           |               |                   |                     |
| Fern           | <i>Selaginella moellendorffii</i> | <i>SmTAL</i>  | 74909             | 423           | 5             | scaffold_0        | 1351640–1353058     |
| Moss           | <i>Physcomitrella patens</i>      | <i>PpTAL</i>  | Pp1s159_68V6      | 438           | 7             | scaffold_159      | 376836–382010       |

**Table S3** The site-specific model parameters

| Branch                      | Model | Log <sub>e</sub> <i>L</i> | Parameters                                                                                              | PSS under NEB <sup>c</sup> | PSS under BEB <sup>d</sup> |
|-----------------------------|-------|---------------------------|---------------------------------------------------------------------------------------------------------|----------------------------|----------------------------|
|                             | M0    | -10086.8220               | $\omega = 0.0608$                                                                                       | -                          | -                          |
|                             | M3    | -9778.1731**              | $p_0 = 0.5461, p_1 = 0.3549, p_2 = 0.0990$<br>$\omega_0 = 0.0025, \omega_1 = 0.0949, \omega_2 = 0.3612$ | NAN                        | NAN                        |
| Land plants <sup>a</sup>    | M1a   | -9973.4908                | $p_0 = 0.9166, p_1 = 0.0834$<br>$\omega_0 = 0.0438, \omega_1 = 1.0000$                                  | -                          | -                          |
|                             | M2a   | -9973.4908                | $p_0 = 0.9166, p_1 = 0.0834, p_2 = 0.0000$<br>$\omega_0 = 0.0438, \omega_1 = 1.0000, \omega_2 = 9.7249$ | NAN                        | NAN                        |
|                             | M7    | -9783.8626                | $\beta(0.2728, 3.3243)$                                                                                 | -                          | -                          |
|                             | M8    | -9596.8567                | $\beta(0.2728, 3.3247)$<br>$p_1 = 0.9999, \omega = 1.0000$                                              | NAN                        | NAN                        |
| Actinobacteria <sup>b</sup> | M0    | -7869.1297                | $\omega = 0.0022$                                                                                       | -                          | -                          |

|     |               |                                                                                                         |     |     |
|-----|---------------|---------------------------------------------------------------------------------------------------------|-----|-----|
| M3  | -7576.9542 ** | $p_0 = 0.2900, p_1 = 0.4343, p_2 = 0.2758$<br>$\omega_0 = 0.0001, \omega_1 = 0.0023, \omega_2 = 0.0087$ | NAN | NAN |
| M1a | -7732.2492    | $p_0 = 0.8041, p_1 = 0.1959$<br>$\omega_0 = 0.0343, \omega_1 = 1.0000$                                  | -   | -   |
| M2a | -7732.2492    | $p_0 = 0.8041, p_1 = 0.0086, p_2 = 0.1873$<br>$\omega_0 = 0.0343, \omega_1 = 1.0000, \omega_2 = 1.0000$ | NAN | NAN |
| M7  | -7581.9788    | $\beta(0.5597, 99.0000)$                                                                                | -   | -   |
| M8  | -7581.9792    | $\beta(0.5597, 99.0000)$<br>$p_1 = 0.0001, \omega = 3.2668$                                             | NAN | NAN |

---

<sup>a</sup>All the *TAL* genes list in Table S2 were used in this analysis. <sup>b</sup>Eight Actinobacteria *TAL* genes followed to the same branch of land plants on the phylogeny were used in this analysis. <sup>c</sup>Positively selected sites (PSS) under naive empirical Bayes (NEB) analysis; <sup>d</sup>positively selected sites (PSS) under Bayes empirical Bayes (BEB) analysis. NAN, not a number.

**Table S4** Morphometric analysis of wild-type and *TAL*-RNAi plants

| Organ                                            | Wild-type      | TAL-Ri           |
|--------------------------------------------------|----------------|------------------|
| Leaf                                             |                |                  |
| Flag leaf length (cm)                            | 26.1 ± 4.9 (7) | 21.0 ± 3.4 (9)*  |
| Flag leaf width (cm)                             | 1.6 ± 0.1 (7)  | 1.3 ± 0.3 (9)**  |
| Number of large veins of flag leaf               | 13.6 ± 1.5 (7) | 11.9 ± 3.6 (9)*  |
| Number of small veins of flag leaf               | 49.4 ± 3.6 (7) | 34.9 ± 5.9 (9)** |
| Stem                                             |                |                  |
| Number of large vascular bundles of internode I  | 14.0 ± 0.8 (7) | 10.0 ± 3.8 (9)** |
| Number of small vascular bundles of internode I  | 30.0 ± 8.6 (7) | 22.0 ± 4.3 (9)*  |
| Number of large vascular bundles of internode II | 30.7 ± 1.4 (7) | 26.0 ± 4.2 (9)** |
| Number of small vascular bundles of internode II | 30.9 ± 0.9 (7) | 25.8 ± 4.3 (9)** |

The flag leaf, internode I and internode II morphometric analyses were carried out at heading stage. Results represent means ± SD of populations of the size indicated in parentheses. Asterisks indicate the significance of differences between wild-type and *TAL*-RNAi as determined by Student's *t* test: \*\*,  $P = 0.01$  level; \*,  $P = 0.05$  level.
